# Supplementary material for: Life-Space Mobility and Objectively Measured Movement Behavior in Older Adults with Hypertension after Receiving COVID-19 Vaccination
Source: MDPI journal article supplement (doi:10.3390/ijerph191912532), 2022-10-01
Supplement: s1 [file s1]

**Table S1.** Moderating effect of housing type on objectively measured changes in the volume of physical activity and sedentary behavior after COVID-19 vaccination in older adults with hypertension ( $n = 32$ ).

|                           | $\beta$ | SE   | 95% CI      | $p^a$        |
|---------------------------|---------|------|-------------|--------------|
| <b>SEDENTARY BEHAVIOR</b> |         |      |             |              |
| <b>Weekdays</b>           |         |      |             |              |
| Sedentary, wear time %    | -3.7    | 2.2  | -8.1, 0.7   | 0.101        |
| Sedentary, min/day        | -31.5   | 22.0 | -75.6, 12.6 | 0.158        |
| <b>Weekend</b>            |         |      |             |              |
| Sedentary, wear time %    | -6.3    | 3.2  | -12.7, 0.1  | <b>0.055</b> |
| Sedentary, min/day        | -60.0   | 30.7 | -121.4, 1.3 | <b>0.055</b> |
| <b>PHYSICAL ACTIVITY</b>  |         |      |             |              |
| <b>Weekdays</b>           |         |      |             |              |
| Light PA, wear time %     | 3.7     | 2.1  | -0.6, 7.9   | <b>0.090</b> |
| Light PA, min/day         | 32.1    | 21.5 | -10.9, 75.2 | 0.141        |
| MVPA, wear time %         | 0.0     | 0.5  | -1.0, 1.0   | 0.993        |
| MVPA, min/day             | -0.6    | 4.8  | -10.2, 9.0  | 0.897        |
| Steps/day                 | 585     | 655  | -726, 1895  | 0.376        |
| <b>Weekend</b>            |         |      |             |              |
| Light PA, wear time %     | 6.5     | 3.2  | 0.2, 12.9   | <b>0.044</b> |
| Light PA, min/day         | 62.4    | 30.5 | 1.3, 123.5  | <b>0.045</b> |
| MVPA, wear time %         | -0.2    | 0.4  | -1.0, 0.6   | 0.584        |
| MVPA, min/day             | -2.3    | 3.6  | -9.5, 4.9   | 0.525        |
| Steps/day                 | 451     | 723  | -996, 1898  | 0.535        |

Values are expressed as coefficient estimates ( $\beta$ ), standard error (SE) and 95% Wald confidence intervals (CI) of the housing type by time period interaction (i.e. change in apartment/row house vs. change in detached house – reference group). <sup>a</sup> The models were analyzed using a generalized linear mixed model controlling for the daily accelerometer wearing time, except for the models of measures of wear time %. Bold values indicate significance at  $p < 0.10$ . Abbreviations: MVPA, moderate-vigorous physical activity; PA, physical activity.
