# Supplementary material for: Life-Space Mobility and Objectively Measured Movement Behavior in Older Adults with Hypertension after Receiving COVID-19 Vaccination
Source: MDPI journal article supplement (doi:10.3390/ijerph191912532), 2022-10-01
Supplement: s1 [file s1]

**Table S3.** Associations of increased life-space mobility with objectively measured changes in the volume of physical activity and sedentary behavior after COVID-19 vaccination in older adults with hypertension residing in apartment/row housing ( $n = 15$ ).

|                           | $\beta$ | SE   | 95% CI       | $p^a$        |
|---------------------------|---------|------|--------------|--------------|
| <b>SEDENTARY BEHAVIOR</b> |         |      |              |              |
| <b>Weekdays</b>           |         |      |              |              |
| Sedentary, wear time %    | -3.1    | 2.7  | -8.5, 2.4    | 0.261        |
| Sedentary, min/day        | -29.6   | 28.7 | -88.7, 29.5  | 0.312        |
| <b>Weekend</b>            |         |      |              |              |
| Sedentary, wear time %    | -7.8    | 4.0  | -16.1, 0.5   | <b>0.065</b> |
| Sedentary, min/day        | -68.5   | 39.6 | -150.0, 13.1 | <b>0.096</b> |
| <b>PHYSICAL ACTIVITY</b>  |         |      |              |              |
| <b>Weekdays</b>           |         |      |              |              |
| Light PA, wear time %     | 2.2     | 2.6  | -3.0, 7.5    | 0.390        |
| Light PA, min/day         | 19.9    | 27.6 | -36.9, 76.7  | 0.477        |
| MVPA, wear time %         | 0.8     | 0.4  | -1.0, 1.7    | <b>0.068</b> |
| MVPA, min/day             | 9.7     | 4.9  | -0.5, 19.9   | <b>0.060</b> |
| Steps/day                 | 1818    | 730  | 314, 3321    | <b>0.020</b> |
| <b>Weekend</b>            |         |      |              |              |
| Light PA, wear time %     | 8.3     | 4.1  | -0.2, 16.7   | <b>0.054</b> |
| Light PA, min/day         | 73.2    | 40.5 | -10.3, 156.6 | <b>0.083</b> |
| MVPA, wear time %         | -0.5    | 0.4  | -1.3, 0.2    | 0.163        |
| MVPA, min/day             | -4.5    | 3.2  | -11.1, 2.1   | 0.175        |
| Steps/day                 | 966     | 1017 | -1128, 3060  | 0.351        |

Values are expressed as coefficient estimates ( $\beta$ ), standard error (SE) and 95% Wald confidence intervals (CI) of the increased life-space mobility by time period interaction (i.e. change in increased life-space group vs. change in change in non-increased life-space group – reference group). <sup>a</sup> The models were analyzed using a generalized linear mixed model controlling for the daily accelerometer wearing time, except for the models of measures of wear time %. Bold values indicate significance at  $p < 0.10$ . Abbreviations: MVPA, moderate-vigorous physical activity; PA, physical activity.
