# Supplementary material for: Life-Space Mobility and Objectively Measured Movement Behavior in Older Adults with Hypertension after Receiving COVID-19 Vaccination
Source: MDPI journal article supplement (doi:10.3390/ijerph191912532), 2022-10-01
Supplement: s1 [file s1]

**Table S2.** Moderating effect of housing type on objectively measured changes in the pattern of physical activity and sedentary behavior after COVID-19 vaccination in older adults with hypertension ( $n = 32$ ).

|                                            | $\beta$ | SE   | 95% CI       | $p^a$        |
|--------------------------------------------|---------|------|--------------|--------------|
| <b>SEDENTARY BEHAVIOR</b>                  |         |      |              |              |
| <b>Weekdays</b>                            |         |      |              |              |
| Sedentary bouts $\geq 10$ min, bouts/day   | -0.7    | 1.2  | -3.0, 1.6    | 0.555        |
| Sedentary bouts $\geq 30$ min, bouts/day   | -0.8    | 0.6  | -1.9, 0.3    | 0.162        |
| Sedentary bouts $\geq 10$ min, min/day     | -45.6   | 31.3 | -108.3, 17.0 | 0.150        |
| Sedentary bouts $\geq 30$ min, min/day     | -47.3   | 26.0 | -99.4, 4.9   | <b>0.075</b> |
| Length of sedentary bouts, min/day         | -0.8    | 0.5  | -1.8, 0.1    | <b>0.091</b> |
| Breaks $\geq 1$ min, breaks/day            | 3.3     | 4.6  | -5.9, 12.5   | 0.478        |
| Breaks $\geq 5$ min, breaks/day            | 3.0     | 1.6  | -0.2, 6.2    | <b>0.066</b> |
| Break rate $\geq 1$ min, breaks/h          | 0.2     | 0.3  | -0.4, 0.7    | 0.495        |
| Break rate $\geq 5$ min, breaks/h          | 0.2     | 0.1  | 0.0, 0.4     | <b>0.052</b> |
| <b>Weekend</b>                             |         |      |              |              |
| Sedentary bouts $\geq 10$ min, bouts/day   | -0.6    | 1.4  | -3.5, 2.3    | 0.672        |
| Sedentary bouts $\geq 30$ min, bouts/day   | -2.2    | 0.9  | -3.9, -0.4   | <b>0.015</b> |
| Sedentary bouts $\geq 10$ min, min/day     | -85.2   | 38.9 | -163.1, -7.3 | <b>0.033</b> |
| Sedentary bouts $\geq 30$ min, min/day     | -106    | 37   | -181, -31    | <b>0.006</b> |
| Length of sedentary bouts, min/day         | -1.6    | 0.7  | -3.0, -0.2   | <b>0.029</b> |
| Breaks $\geq 1$ min, breaks/day            | 11.8    | 6.0  | -0.2, 23.8   | <b>0.053</b> |
| Breaks $\geq 5$ min, breaks/day            | 5.9     | 2.3  | 1.2, 10.6    | <b>0.014</b> |
| Break rate $\geq 1$ min, breaks/h          | 0.7     | 0.4  | 0.0, 1.5     | <b>0.052</b> |
| Break rate $\geq 5$ min, breaks/h          | 0.4     | 0.1  | 0.1, 0.7     | <b>0.014</b> |
| <b>PHYSICAL ACTIVITY</b>                   |         |      |              |              |
| <b>Weekdays</b>                            |         |      |              |              |
| Light PA in bouts $\geq 10$ min, bouts/day | 1.0     | 0.7  | -0.5, 2.4    | 0.194        |
| Light PA in bouts $\geq 10$ min, min/day   | 13.6    | 12.5 | -11.4, 38.7  | 0.281        |
| MVPA in bouts $\geq 10$ min, bouts/day     | 0.0     | 0.1  | -0.3, 0.3    | 0.943        |
| MVPA in bouts $\geq 10$ min, min/day       | -3.6    | 3.1  | -9.8, 2.6    | 0.249        |
| <b>Weekend</b>                             |         |      |              |              |
| Light PA in bouts $\geq 10$ min, bouts/day | 1.0     | 1.0  | -1.0, 3.0    | 0.326        |
| Light PA in bouts $\geq 10$ min, min/day   | 7.7     | 18.4 | -29.1, 44.5  | 0.677        |
| MVPA in bouts $\geq 10$ min, bouts/day     | -0.2    | 0.1  | -0.5, 0.1    | 0.132        |
| MVPA in bouts $\geq 10$ min, min/day       | -6.6    | 4.2  | -15.0, 1.9   | 0.125        |

Values are expressed as coefficient estimates ( $\beta$ ), standard error (SE) and 95% Wald confidence intervals (CI) of the housing type by time period interaction (i.e. change in apartment/row house vs. change in detached house – reference group). <sup>a</sup> The models were analyzed using a generalized linear mixed model controlling for the daily accelerometer wearing time, except for the length of sedentary bouts and the break rate. Bold values indicate significance at  $p < 0.10$ . Abbreviations: MVPA, moderate-vigorous physical activity; PA, physical activity.
