# Supplementary material for: Life-Space Mobility and Objectively Measured Movement Behavior in Older Adults with Hypertension after Receiving COVID-19 Vaccination
Source: MDPI journal article supplement (doi:10.3390/ijerph191912532), 2022-10-01
Supplement: s1 [file s1]

**Table S4.** Associations of increased life-space mobility with objectively measured changes in the physical activity and sedentary behavior pattern after COVID-19 vaccination in older adults with hypertension residing in apartment/row housing ( $n = 15$ ).

|                                            | $\beta$ | SE   | 95% CI       | $p^a$        |
|--------------------------------------------|---------|------|--------------|--------------|
| <b>SEDENTARY BEHAVIOR</b>                  |         |      |              |              |
| <b>Weekdays</b>                            |         |      |              |              |
| Sedentary bouts $\geq 10$ min, bouts/day   | -1.6    | 1.3  | -4.3, 1.2    | 0.251        |
| Sedentary bouts $\geq 30$ min, bouts/day   | -0.9    | 0.9  | -2.7, 0.8    | 0.285        |
| Sedentary bouts $\geq 10$ min, min/day     | -44.4   | 44.6 | -136.3, 47.6 | 0.330        |
| Sedentary bouts $\geq 30$ min, min/day     | -36.7   | 39.5 | -117.9, 44.6 | 0.362        |
| Length of sedentary bouts, min/day         | -0.3    | 0.6  | -1.6, 0.1    | 0.662        |
| Breaks $\geq 1$ min, breaks/day            | -1.7    | 5.2  | -12.4, 9.0   | 0.745        |
| Breaks $\geq 5$ min, breaks/day            | 3.5     | 2.3  | -1.2, 8.2    | 0.134        |
| Break rate $\geq 1$ min, breaks/h          | -0.2    | 0.3  | -0.8, 0.4    | 0.587        |
| Break rate $\geq 5$ min, breaks/h          | 0.2     | 0.1  | -0.1, 0.5    | 0.125        |
| <b>Weekend</b>                             |         |      |              |              |
| Sedentary bouts $\geq 10$ min, bouts/day   | -4.2    | 1.7  | -7.8, -0.7   | <b>0.022</b> |
| Sedentary bouts $\geq 30$ min, bouts/day   | -1.4    | 1.1  | -3.6, 0.9    | 0.215        |
| Sedentary bouts $\geq 10$ min, min/day     | -76.4   | 58.0 | -195.9, 43.1 | 0.200        |
| Sedentary bouts $\geq 30$ min, min/day     | -38.1   | 56.9 | -155.2, 79.0 | 0.509        |
| Length of sedentary bouts, min/day         | -0.7    | 1.1  | -3.0, 1.6    | 0.557        |
| Breaks $\geq 1$ min, breaks/day            | -0.8    | 10.2 | -21.8, 20.3  | 0.942        |
| Breaks $\geq 5$ min, breaks/day            | 8.2     | 2.6  | 2.9, 13.5    | <b>0.004</b> |
| Break rate $\geq 1$ min, breaks/h          | -0.1    | 0.6  | -1.2, 1.1    | 0.890        |
| Break rate $\geq 5$ min, breaks/h          | 0.5     | 0.2  | 0.2, 0.9     | <b>0.004</b> |
| <b>PHYSICAL ACTIVITY</b>                   |         |      |              |              |
| <b>Weekdays</b>                            |         |      |              |              |
| Light PA in bouts $\geq 10$ min, bouts/day | 1.1     | 1.2  | -1.3, 3.5    | 0.337        |
| Light PA in bouts $\geq 10$ min, min/day   | 11.1    | 16.8 | -23.6, 45.8  | 0.516        |
| MVPA in bouts $\geq 10$ min, bouts/day     | 0.3     | 0.2  | -0.1, 0.7    | 0.109        |
| MVPA in bouts $\geq 10$ min, min/day       | 3.8     | 4.2  | -4.8, 12.4   | 0.367        |
| <b>Weekend</b>                             |         |      |              |              |
| Light PA in bouts $\geq 10$ min, bouts/day | 3.0     | 1.3  | 0.2, 5.7     | <b>0.038</b> |
| Light PA in bouts $\geq 10$ min, min/day   | 52.0    | 24.8 | 1.0, 103.0   | <b>0.046</b> |
| MVPA in bouts $\geq 10$ min, bouts/day     | -0.1    | 0.1  | -0.3, 0.2    | 0.674        |
| MVPA in bouts $\geq 10$ min, min/day       | -5.9    | 5.7  | -17.8, 5.9   | 0.311        |

Values are expressed as coefficient estimates ( $\beta$ ), standard error (SE) and 95% Wald confidence intervals (CI) of the increased life-space mobility by time period interaction (i.e. change in increased life-space group vs. change in non-increased life-space group – reference group). <sup>a</sup> The models were analyzed using a generalized linear mixed model controlling for the daily accelerometer wearing time, except for the length of sedentary bouts the and break rate. Bold values indicate significance at  $p < 0.10$ . Abbreviations: MVPA, moderate-vigorous physical activity; PA, physical activity.
